1 ***Colletotrichum higginsianum* effectors exhibit cell to cell hypermobility in plant tissues**  
2 **and modulate intercellular connectivity amongst a variety of cellular processes**

3

4 Mina Ohtsu<sup>1†</sup>, Joanna Jennings<sup>1†</sup>, Matthew Johnston<sup>1</sup>, Xiaokun Liu<sup>1</sup>, Aoife Hughes<sup>2</sup>, Kara  
5 Stark<sup>1‡</sup>, Richard J. Morris<sup>2</sup>, Jeroen de Keijzer<sup>1¶</sup>, Christine Faulkner<sup>1\*</sup>

6

7 <sup>1</sup>Crop Genetics, John Innes Centre, Norwich Research Park, UK

8 <sup>2</sup>Computational and Systems Biology, John Innes Centre, Norwich Research Park, UK

9 <sup>‡</sup>Present address: Developmental and Stem Cell Biology, Duke University, Durham, North  
10 Carolina, USA

11 <sup>¶</sup>Present address: Cluster Plant Developmental Biology, Wageningen University,  
12 Droevendaalse steeg 1, 6708 PB, Wageningen, The Netherlands

13 <sup>†</sup>These authors contributed equally to this work

14 \*Corresponding author: [christine.faulkner@jic.ac.uk](mailto:christine.faulkner@jic.ac.uk), +44 (0)1603 450000

15

16 **Summary**

17 Multicellular organisms exchange information and resources between cells to co-ordinate  
18 growth and responses. In plants, plasmodesmata establish cytoplasmic continuity between cells  
19 to allow for communication and resource exchange across the cell wall. Some plant pathogens  
20 use plasmodesmata as a pathway for both molecular and physical invasion. However, the  
21 benefits of molecular invasion (cell-to-cell movement of pathogen effectors) are poorly  
22 understood. To begin to investigate this and identify which effectors are cell-to-cell mobile, we  
23 performed a live imaging-based screen and identified 15 cell-to-cell mobile effectors of the  
24 fungal pathogen *Colletotrichum higginsianum*. Of these, 6 are “hypermobile”, showing cell-  
25 to-cell mobility greater than expected for a protein of its size. We further identified 3 effectors  
26 that can indirectly modify plasmodesmal aperture. Transcriptional profiling of plants  
27 expressing hypermobile effectors implicate them in a variety of processes including senescence,  
28 glucosinolate production, cell wall integrity, growth and iron metabolism. However, not all  
29 effectors had an independent effect on virulence. This suggests a wide range of benefits to

30 infection gained by the mobility of *C. higginsianum* effectors that likely interact in a complex  
31 way during infection.

32

33

## 34 Introduction

35 Cell-to-cell communication is essential for multicellularity and there are a variety of  
36 mechanisms by which cells exchange information and resources. Plant cells are surrounded by  
37 cell walls but have tunnel-like structures called plasmodesmata which cross the cell wall and  
38 directly connect the cytoplasm of adjacent cells to establish the symplast. Small molecules such  
39 as sugars, metabolites and hormones can all move between cells through plasmodesmata (Stahl  
40 and Simon, 2013; Cheval and Faulkner, 2018; Liu and Chen, 2018), driven by advection and  
41 diffusion. Further, larger proteins can pass between cells via mechanisms that involve active  
42 components such as protein unfolding and refolding or possible intercellular trafficking  
43 motifs/domain (Kragler *et al.*, 1998; Taoka *et al.*, 2007; Xu *et al.*, 2011; Chen *et al.*, 2013;  
44 Chen *et al.*, 2014).

45 The regulation of plasmodesmata is a critical component of plant-microbe interactions.  
46 Many plant immune responses are triggered by cell autonomous recognition of pathogen  
47 molecules, but we and others have shown that plasmodesmata dynamically respond to immune  
48 signals. We previously found that both fungal and bacterial molecules induce plasmodesmal  
49 closure in *Arabidopsis thaliana*. Chitin (from fungal cell walls) and flg22 (from bacterial  
50 flagellin) both trigger plasmodesmal closure, regulated by LYSM-CONTAINING GPI-  
51 ANCHORED PROTEIN 2 (LYM2) and CALMODULIN-LIKE 41 respectively (Faulkner *et al.*  
52 *et al.*, 2013; Xu *et al.*, 2017). Observations that plasmodesmal function influences infection  
53 outcomes identify that plasmodesmal responses are key to ultimate defence success (Lee *et al.*  
54 2011; Faulkner *et al.*, 2013; Caillaud *et al.*, 2014; Xu *et al.*, 2017). This suggest two  
55 possibilities: plasmodesmal regulation is important for the execution of plant immune  
56 responses and/or it impairs infection mechanisms deployed by the invading pathogens. The  
57 latter implicates pathogen access to the symplast as a critical component of infection.

58 Plasmodesmata present a route by which microbes can access non-infected cells and  
59 tissues. Indeed, there are several examples of pathogens directly using plasmodesmata to  
60 facilitate their passage between host cells in a growing infection. The best understood examples  
61 of this are viral infections such as *Cucumber mosaic virus* (CMV) and *Tobacco mosaic virus*  
62 (TMV) (Heinlein and Epel, 2004). As obligate parasitic pathogens that infect intracellularly,  
63 viruses actively target and modify plasmodesmata to translocate their genomes between cells  
64 to establish an infection. Interestingly, it has also been revealed that some hemi-biotrophic  
65 fungal pathogens, including the rice blast pathogen *Magnaporthe oryza*, pass from cell to cell

66 at plasmodesmal pitfields (Kankanala *et al.*, 2007). These demonstrate that plant pathogens  
67 across different kingdoms have acquired the capacity to recognize and exploit plasmodesmata  
68 as sites of connection between cells to enable the spread of infection.

69 In order to manipulate host plant systems, plant pathogens secrete an arsenal of proteins,  
70 called effectors (Le Fevre *et al.*, 2015; Toruño *et al.*, 2016). Plasmodesmata allow the spread  
71 of soluble molecules, and while effectors can act in the host cell to which they are delivered,  
72 soluble effectors also have the potential to move between cells via plasmodesmata. Indeed, *M.*  
73 *oryzae* produces the PWL2 and BAS1 effectors that can move into non-infected cells (Khang  
74 *et al.*, 2010). This suggests that pathogens exploit plasmodesmata to access and manipulate  
75 non-infected cells ahead of the infection front. Further implicating the symplast in infection,  
76 the *Fusarium oxysporum* effector Six5 was found to enable cell-to-cell translocation of its co-  
77 transcribed effector Avr2 via plasmodesmata (Cao *et al.*, 2018). Moreover, both the  
78 *Pseudomonas syringae* effector HopO1-1 and the *Phytophthora Brassicaceae* effector RxLR3  
79 target and modify plasmodesmata (Aung *et al.*, 2020; Tomcynska *et al.*, 2020).

80 It is not yet fully understood what a microbe gains by accessing the host symplast, or  
81 how common cell-to-cell mobility is within effector repertoires. To address these questions,  
82 we characterized the cell-to-cell mobility of candidate effectors from the hemi-biotrophic  
83 fungal pathogen *Colletotrichum higginsianum*. We used a live imaging-based screen to identify  
84 candidate effectors that move cell to cell in plant tissues and identified effectors that are cell-  
85 restricted (immobile), move cell to cell to a degree expected for a protein of that size (mobile)  
86 and move further than expected (hypermobile). Within the hypermobile effectors, we identified  
87 effectors that modify plasmodesmata, consistent with enhanced mobility, and one with a  
88 signature of active translocation. Expression of hypermobile effectors in host tissue identified  
89 that these three effectors have a differential effect on pathogen virulence and the host  
90 transcriptome. The latter identified processes associated with nutrient uptake and defence that  
91 illustrate what *C. higginsianum* gains by molecular invasion of host tissues. We conclude that  
92 pathogen access to the host symplast is a complex component of the infection strategy of *C.*  
93 *higginsianum* allowing it to manipulate a variety of host processes ahead of the infection front.

94

95

## 96 **Material and Methods**

### 97 **Plant material**

98 *Nicotiana benthamiana* plants were grown at 23 °C under long day conditions (16 h: 8 h,  
99 light: dark). *Arabidopsis thaliana* were grown on soil at 22 °C under short day conditions (10  
100 h: 14 h, light: dark) or on MS media under short day conditions (10 h: 14 h, light: dark).

### 101 **DNA Constructs**

102 Constructs for plant expression were assembled using the Golden Gate cloning method  
103 (Engler *et al.*, 2008) and all module information is in Table S1. The coding sequences of  
104 effector candidates (without predicted signal peptides) were domesticated to remove BpI and  
105 BsaI sites and synthesised as Golden Gate-compatible Level 0 vectors. For subcellular  
106 localisation analysis, effector sequences were fused to the N-terminus of GFP and expressed  
107 from the CaMV 35S promoter. For the cell-to-cell mobility assay and generating *Arabidopsis*  
108 stable lines, multi-component binary vectors were assembled as outlined in Fig. S1 and Table  
109 S1.

### 110 **Plant transformation**

111 Transient gene expression in *N. benthamiana* was performed as described (Cheval *et al.*,  
112 2020). *Agrobacterium tumefaciens* (GV3101) carrying binary plasmids were infiltrated into *N.*  
113 *benthamiana* leaves at  $OD_{600nm} = 1.0 \times 10^{-2}$  to check subcellular localisation and at  $OD_{600nm} =$   
114  $1.0 \times 10^{-5}$  to generate single cell transformation events for the mobility assay. Samples were  
115 imaged 72 h post infiltration. Stable transgenics were made by floral dipping *Arabidopsis Col-*  
116 *0*.

### 117 **Microscopy**

118 Leaf tissue was imaged by confocal microscopy (Zeiss LSM800) with a 20x water-dipping  
119 objective (W N-ACHROPLAN 20x/0.5; Zeiss). GFP was excited with a 488 nm solid-state  
120 laser and collected at 509-530 nm and dTomato was excited by a 561 nm solid-state laser and  
121 collected at 600-640 nm using sequential scanning.

### 122 **Image and data analysis**

123 To quantify effector-GFP mobility we recorded the number of fluorescent cells around the  
124 transformed cell, identified by NLS-dTomato fluorescence. Data analysis was performed in R  
125 statistical computing language v4.0.3 (R Core Team, 2020). The standard curve was generated

126 with data obtained from mobility of GFP, YFP<sub>N</sub>-GFP, YFP<sub>C</sub>-GFP and 2xGFP using a quasi-  
127 Poisson generalised linear model with a log link function and a Bonferroni corrected p-value <  
128  $1 \times 10^{-5}$ . Effectors were determined to be significantly mobile by the equivalent of a t-test for  
129 Poisson distributions (an exact Poisson test) in which the mobility (cell count at 3dpi) is  
130 significantly different to the standard curve ( $p < 1 \times 10^{-5}$ ). For analysis of NLS-dTomato  
131 movement in the presence of different effectors we tested the null hypothesis that mobility of  
132 NLS-dTomato is 2.5 cells (as observed for the set of standard constructs) and independent of  
133 effector mobility using an exact Poisson test.

#### 134 **Protein extraction and Western blotting**

135 Protein extraction was performed as described (Adachi *et al.*, 2019). *N. benthamiana*  
136 leaves transiently expressing effectors were collected tissue for protein extraction 3 days post  
137 infiltration. Leaf material was homogenised in ice-cold extraction buffer (10% glycerol, 25  
138 mM Tris pH 7.5, 1 mM EDTA, 150 mM NaCl, 2% w/v PVPP, 10 mM DTT, protease inhibitor  
139 cocktail (Sigma), 0.2% Igepal (Sigma)) and the soluble fraction was collected by centrifugation  
140 at 12,000 xg for 10 min. Proteins were separated by SDS-PAGE and transferred PVDF  
141 membrane (BioRad). Proteins were detected with 1/5,000-diluted anti-GFP conjugated to HRP  
142 (sc-9996; Santa Cruz Biotechnology).

#### 143 **Microprojectile bombardment**

144 Microprojectile bombardment assays were performed as described (Faulkner *et al.*, 2013).  
145 Four- to six-week-old expanded leaves of relevant Arabidopsis lines were bombarded with 1  
146 nm gold particles (BioRad) coated with pB7WG2.0-mRFP, using a Biolistic PDS-1000/He  
147 particle delivery system (BioRad). Bombardment sites were imaged 24 h post bombardment  
148 by confocal microscopy (Zeiss LSM800) with a 10x (EC Plan-NEOFLUAR 10× 0.3; Zeiss) or  
149 20x dry objective (Plan-APOCHROMAT 20x/0.8; Zeiss). Data were collected from at least 2  
150 independent bombardment events, each of which consisted of leaves from at least 3 individual  
151 plants. The median normalised mobility (#cells) for different lines was analysed in R statistical  
152 computing language v4.0.3 (R Core Team, 2020) by a bootstrap method (Johnston and  
153 Faulkner, 2020).

#### 154 ***C. higginsianum* infection**

155 *C. higginsianum* spores ( $5 \times 10^6$  spores/mL) were drop-inoculated on detached leaves of  
156 4- to 5-week-old Arabidopsis plants on 2% water agar plates. Plates were sealed with parafilm

157 and left for 6 days under short day conditions (10 h: 14 h, light: dark; 25 °C). The area of  
158 necrotic lesions was measured in Fiji (Schindelin *et al.*, 2012). Lesions were measured for at  
159 least 30 plants (2 leaves per plant) and across 3 independent experiments. The mean lesion area  
160 for different lines was compared using a bootstrapping method (Johnston and Faulkner, 2020).

## 161 **RNAseq analysis and GO term analyses**

162 Leaves 7 and 8 of 4-week-old MS grown Arabidopsis was harvested for RNA extraction.  
163 Leaves from 3 plants were pooled for a single replicate and 3 replicates were collected for each  
164 genotype. RNA was extracted using RNAeasy Mini Kit (Qiagen) followed by DNase treatment  
165 (TurboDNase, ThermoFisher Scientific). Library preparation and Illumina sequencing (PE150,  
166 Q30>80%) with 10M paired reads was performed by Novogene. Sequencing reads quality was  
167 evaluated using FastQC v0.11.9 (Andrews, 2010) and multiqc v1.9 (Ewels *et al.*, 2016). After  
168 quality control, trimmomatic v0.39 was used to remove Illumina sequence adapters and low-  
169 quality reads. Processed reads were re-assessed with FastQC v0.11.9 and mapped to the  
170 Arabidopsis thaliana TAIR10 release 37 genome assembly using hisat2 v2.2.0 and samtools  
171 v1.11 (Li *et al.*, 2009).

172 Differential expression analysis was performed with DESeq2 v1.20.0 (Love *et al.*, 2014)  
173 and the R statistical computing language v4.0.3 (R Core Team, 2020). Analysis using the  
174 methods described by Love *et al.*, 2014. were used to calculate normalised expression values  
175 for each gene across all samples. Normalised expression values were compared for all  
176 expressed genes in Col-0 to those in the effector expressing lines using a hypergeometric test  
177 with the Benjamini and Hochberg False Discovery Rate (FDR) correction. Differentially  
178 expressed genes were defined by  $|\log_2[\text{fold change}]| \geq 1$  and FDR corrected  $p$ -value  $< 0.01$ .  
179 Differentially expressed genes were analysed by GoTermFinder (Boyle *et al.*, 2004) with a  
180 hypergeometric test with a Bonferroni correction to identify biological processes enriched in  
181 the samples (adjusted  $p$ -value  $> 0.01$ ). CirGO (Kuznetsova *et al.*, 2019) was used to visualise  
182 the results.

183

## 184 **Results**

### 185 **Identification of candidate cell-to-cell mobile *Colletotrichum higginsianum* effectors**

186 To establish a candidate list of putative *C. higginsianum* effectors (hereafter referred to as  
187 effectors) exhibiting cell-to-cell mobility, we mined published transcriptome data covering

188 different infection stages (O'Connell *et al.*, 2012; Dallery *et al.*, 2017). Many effectors are  
189 secreted from pathogens into host plant tissues (Lo Presti *et al.*, 2015), and therefore we limited  
190 our candidate cell-to-cell mobile effectors as those that encode conventionally secreted proteins  
191 with a predicted signal peptide. Gene expression data in O'Connell *et al.* (2012) defines  
192 expression profiles during the following stages of growth and infection: *in vitro* appressoria  
193 (VA), *in planta* appressoria (PA), biotrophic phase (BP) of infection and necrotrophic phase  
194 (NP) of infection. We reasoned that cell-to-cell mobile effectors would be primarily relevant  
195 during the penetration (PA) and biotrophic phases (BP) of infection (i.e. when the host tissue  
196 is alive) and thus defined candidate cell-to-cell mobile effectors as those that have enhanced  
197 expression in PA and BP phases relative to the other 2 stages (i.e. PA/VA, BP/VA, PA/NP, and  
198 BP/NP >2). We further limited candidates to those for which PA reads > 50 and BP reads > 20.  
199 These criteria produced a list of 46 candidate effectors.

200 Plant proteins that are known to be cell-to-cell mobile are typically soluble within the  
201 cytoplasm or the nucleus (Kim *et al.*, 2002; Gallagher *et al.*, 2004; Gallagher and Benfey, 2009;  
202 Chen *et al.*, 2013) and we made the assumption that *C. higginsianum* cell-to-cell mobile  
203 proteins would have similar properties. Thus, to further refine our list of candidate cell-to-cell  
204 mobile effectors, we cloned these 46 candidate effectors as fusions to GFP and screened for  
205 nucleocytoplasmic and nuclear subcellular localisations by transient transformation of *N.*  
206 *benthamiana*. Of these 46 effector-GFP fusions, 25 showed nucleocytoplasmic localisation but  
207 none showed a specific nuclear localisation.

## 208 **Live cell screening for cell-to-cell mobility**

209 To assay the cell-to-cell mobility of candidate effectors, we performed a live cell imaging-  
210 based screen using transient transformation of single epidermal cells in *N. benthamiana*. For  
211 this we used Golden Gate modular cloning (Engler *et al.*, 2008) to assemble effector-GFP  
212 fusions and a cell transformation marker in a single vector as a dual expression cassette vector  
213 (Fig. 1a). For a cell transformation marker, we used dTomato fused to a nuclear localisation  
214 sequence (NLS-dTomato), reasoning that the dimerization properties of dTomato would make  
215 a protein complex too large to move from cell to cell.

216 To confirm the utility of NLS-dTomato as a cell transformation marker, we generated  
217 constructs that express GFP or 2xGFP with NLS-dTomato (pICH4723.GFP.NLS-dTomato and  
218 pICH4723.2xGFP.NLS-dTomato respectively). Agrobacterium infiltration of *N. benthamiana*  
219 leaves demonstrated that both fluorophores were expressed in the transformed cell. While GFP



220 was frequently seen to move freely from the transformed cell, both NLS-dTomato and 2xGFP  
221 were mostly retained within the transformed cell (Fig. 1 and S1).

222 Cell-to-cell mobility via plasmodesmata is dependent upon the size of the molecule  
223 (Oparka *et al.*, 1999; Crawford and Zambryski., 2001). To determine the relationship between  
224 size and mobility in *N. benthamiana* leaves in more detail, we assayed the mobility of four  
225 proteins of different sizes: GFP (26 kDa), YFPc-GFP (37.2kDa), YFPn-GFP (45 kDa) and 2x  
226 GFP (52 kDa) (Fig. S1). We generated single cell transformation sites by low OD<sub>600</sub>  
227 *Agrobacterium* infiltration of *N. benthamiana* leaves and counted the number of cells which  
228 exhibited GFP surrounding a transformed cell for each construct (marked by NLS-dTomato)  
229 (Fig. 1). We fit a quasi-Poisson function through the data which makes minimal assumptions,  
230 obtaining a smooth fit through the data that allows for the infrequent mobility of the larger  
231 standard proteins (Fig. S1). However, we point out that the data itself does not exclude the  
232 existence of a SEL which could be anywhere upwards from YFPc-GFP. This model, with a  
233 Bonferroni corrected confidence interval of the mean ( $p < 1 \times 10^{-5}$ ), defined a standard curve  
234 against which to compare mobility of effectors of varying sizes.

### 235 **Cell-to-cell mobility screen identifies mobile and hypermobile effectors**

236 To characterize the cell-to-cell mobility of nucleocytoplasmic effectors, we cloned each  
237 of the 25 effectors in a dual expression cassette vector as described (i.e. pICH4723.Effector-  
238 GFP.NLS-dTomato) (Fig. 1a). Assaying for cell-to-cell mobility, we observed varying degrees  
239 of cell-to-cell mobility for the effectors (i.e. Fig. 1, lower panels); 10 effectors were restricted  
240 to the transformed cell (i.e. Fig. 1b, middle panels) in *N. benthamiana* and 15 exhibited cell-  
241 to-cell mobility (Table S2).

242 To determine whether an effector's mobility was as expected for a soluble protein of that  
243 size, we compared effector mobility to the standard curve (Fig. S1b; Fig. S2). An exact Poisson  
244 test identified a subset of 7 effectors that had greater than expected mobility, and we defined  
245 these as 'hypermobile' (Fig. 2). To confirm that this mobility did not arise from cleavage of  
246 the effector-GFP fusion (to produce a smaller and thus more mobile protein), we assayed the  
247 protein size of the GFP-fused 7 hypermobile effectors expressed in *N. benthamiana* by protein  
248 extraction and Western blot analysis. Two strong bands for ChEC130-GFP were observed,  
249 suggesting this effector is cleaved in host cells (Fig. S3). However, the other 6 effectors showed  
250 little evidence of significant degradation or cleavage (Fig. S3). Thus, we concluded that  
251 ChEC123, ChEC124, ChEC125, ChEC128, ChEC129 and ChEC132 are hypermobile.

## 252 **Mobile effectors can modify plasmodesmal function**

253 The identification of both mobile and hypermobile effectors suggests that *C. higginsianum*  
254 might access the host symplast via different mechanisms. Hypermobility suggests three  
255 possibilities: that the shapes or Stokes radius of such effectors allows for more efficient  
256 translocation through plasmodesmata; that effectors exploit an active translocation mechanism;  
257 or effectors modify PD (directly or indirectly) which allows their passage. To address the  
258 question of whether mobile and hypermobile effectors modified plasmodesmal function, we  
259 exploited the unexpected low-level mobility of NLS-dTomato observed post-collection when  
260 the image contrast was adjusted (Fig. S4). NLS-dTomato clearly marked the transformed cell  
261 in all cases, but upon increasing the contrast of the images it was observed in an average of 2.5  
262 cells surrounding the brightest transformed cell in size-standard controls (Fig. S4a; Fig. S5).  
263 We quantified NLS-dTomato movement when co-expressed with each mobile and  
264 hypermobile effector and observed variation in the spread of NLS-dTomato (Fig. 3a; Fig. S4b).  
265 To determine if hypermobility is associated with a general increase in mobility that would  
266 indicate plasmodesmal regulation, we compared relative mobility  
267 ( $Mob_r = Mob_{observed} / Mob_{expected}$ ) to the mobility of NLS-dTomato. An exact Poisson test of this  
268 data, using the null hypothesis that mobility of NLS-dTomato is 2.5 cells for all values of  $Mob_r$ ,  
269 revealed that ChEC127 and ChEC8 both significantly increase NLS-dTomato mobility (Fig.  
270 3a). This result suggests that ChEC127 and ChEC8 modify plasmodesmal function. Curiously,  
271 while ChEC127 is a hypermobile effector, ChEC8 is not, suggesting that despite modifying  
272 plasmodesmal function, the effector itself does not have increased translocation. This  
273 phenomenon might be explained if ChEC8 binds other proteins in plant cells to increase its  
274 effective size.

275 NLS-dTomato is targeted to the nucleus and therefore has a limited pool available in the  
276 cytoplasm for cell-to-cell movement. Further, NLS-dTomato is expected to dimerise to form a  
277 complex that we expect has reduced mobility as a consequence of increased size. Thus,  
278 mobility of this protein is a low sensitivity marker for changes to plasmodesmal function  
279 detecting only large changes to plasmodesmal aperture. Therefore, we extended our analysis  
280 of plasmodesmal function in the presence of hypermobile mobile effectors to examine the  
281 mobility of cytoplasmic mRFP in *Arabidopsis*, a native host plant of *C. higginsianum*. For this,  
282 we generated *Arabidopsis* lines that stably express fluorescent protein fusions of the  
283 hypermobile effectors ChEC123, ChEC127 and ChEC132 (Fig. S6). We performed  
284 microprojectile bombardment assays on expanded leaves of two independent lines of each

285 effector (Faulkner *et al.*, 2013) and quantified spread of mRFP from transformed cells one day  
286 post-bombardment. This data showed that mRFP diffusion in ChEC123-expressing lines was  
287 similar to Col-0, while ChEC127 and ChEC132 expressing lines showed increased movement  
288 of mRFP relative to the Col-0 control (Fig. 3b). Thus, this data indicates that Ch132 also  
289 modifies plasmodesmal function like ChEC127 and ChEC8, and that ChEC123 mediates its  
290 translocation by a possible active mechanism that does not involve plasmodesmal modification.

### 291 **Heterologous expression of ChEC127 promotes virulence**

292 Pathogen effectors are assumed to positively regulate virulence, facilitating infection  
293 success. To assess whether the hypermobile effectors ChEC123, ChEC127 and ChEC132  
294 independently promote virulence, we infected plants constitutively expressing these effectors  
295 with *C. higginsianum* and measured the size of disease lesions 6 days post inoculation. These  
296 assays showed that both independent transgenic lines that express ChEC127 develop larger  
297 disease lesions (Fig. 4), identifying that expression of ChEC127 promotes virulence. Plants  
298 expressing ChEC123 or ChEC132 showed no increase in susceptibility (Fig. 4), suggesting that  
299 in these conditions neither effector independently promotes virulence.

### 300 **ChEC132 and ChEC123 transcriptionally perturb a variety of host processes**

301 To explore the function of hypermobile effectors, and thus ask what a pathogen might gain  
302 from these during infection, we assayed changes to the plant transcriptome induced by  
303 ChEC123, ChEC127 and ChEC132. For this, we performed RNAseq analysis of leaf tissue of  
304 plants constitutively expressing ChEC123-GFP, ChEC127-GFP and ChEC132-GFP relative to  
305 Col-0, defining differentially expressed genes as those for which we detected at least a 2-fold  
306 up or down regulation ( $|\log_2[\text{fold change}]| \geq 1$ ) and an FDR corrected  $p$ -value  $< 0.01$ . To identify  
307 processes that are perturbed by these effectors, we used GO Term Finder (Boyle *et al.*, 2004)  
308 to identify biological processes that are significantly enriched within the differentially  
309 expressed genes for each effector.

310 Despite positively regulating virulence, ChEC127 differentially regulated the expression  
311 of only 13 genes (11 up-regulated and 2 down-regulated; Table S4). By contrast, expression of  
312 ChEC123 and ChEC132 caused differential expression of 176 and 217 genes respectively  
313 (Table S3; S5). GO term analysis indicates ChEC123 up-regulated genes associated with leaf  
314 senescence (Fig. 5c) and down regulates genes associated with glycosyl compound catabolism  
315 and iron starvation responses and transport (Fig. 5b). Constitutive expression of ChEC132 also  
316 induced down regulation of genes associated with iron transport and responses, in addition to

317 cell wall modification, growth, syncytium formation (5 *EXPANSIN* genes also represented in  
318 the cell wall loosening GO term), and lipid metabolism (Fig. 5a).

319

## 320 **Discussion**

321 Host cell-to-cell connectivity is increasingly identified as a component of plant immunity  
322 and pathogen infection. This suggests that pathogen access to non-infected cells is important  
323 for the infection strategies of a range of pathogens. Previous studies have identified that  
324 specific effectors move cell-to-cell in host tissues (Khang *et al.*, 2010; Cao *et al.*, 2018), and  
325 it was recently suggested that cell-to-cell mobility is a property common to many proteins  
326 within an effector repertoire (Li *et al.*, 2020). To investigate this further, we performed a  
327 screen for cell-to-cell mobility of effectors from the hemi-biotrophic pathogen *C.*  
328 *higginsianum*. We generated a candidate list of secreted effectors from publicly available data  
329 and used live-cell imaging to identify a subset of 25 that have a nucleocytoplasmic localisation  
330 similar to many known cell-to-cell mobile molecules. To identify mobile effectors, we  
331 established a live cell imaging-based screen for cell-to-cell mobility and identified that 60%  
332 of nucleocytoplasmic effectors are cell-to-cell mobile (15/25), with 24% (6/25) showing greater  
333 than expected mobility (hyper-mobility) (Fig. 2; Fig. S2; Table S2).

334 In addition to identifying that cell-to-cell mobility is possible for a range of effectors, our  
335 data suggests that effectors from *C. higginsianum* can move through plasmodesmata by  
336 different mechanisms. Firstly, we identified a subset of effectors that move ‘passively’ from  
337 cell to cell, i.e. they move through plasmodesmata at a rate expected for soluble molecules of  
338 the same size (Fig. 2). Like the endogenous plant transcription factor LEAFY (Wu *et al.*,  
339 2003), these molecules can be considered to have no mechanism for active translocation and  
340 simply move from cell to cell as soluble, freely diffusive molecules. Secondly, we identified  
341 hypermobile effectors that modify plasmodesmal function such as ChEC127 and ChEC132.  
342 These effectors trigger plasmodesmata opening to a degree such that the effector itself (Fig.  
343 2), as well as other soluble molecules (as observed for mRFP; Fig. 3b), can move faster and  
344 further to neighbouring cells. Thirdly, we identified one hypermobile effector, ChEC123, that  
345 has no general effect on plasmodesmal function (Fig. 2; Fig. 3). This effector could therefore  
346 be considered to have an active and specific mode of translocation to surrounding cells similar  
347 to endogenous plant transcription factors such as SHORT-ROOT (SHR) (Nakajima *et al.*  
348 2001), KNOTTED1(KN1) (Lucas *et al.*, 1995) or Dof family proteins (Chen *et al.*, 2013).

349 This data identifies different mechanisms by which individual effectors can access the  
350 symplast, but this data must be considered in the context of infection. Thus, the presence of  
351 multiple effectors that modify plasmodesmata during infection raises the possibility that there  
352 is a general increase in plasmodesmal aperture that might allow cell-to-cell mobility of  
353 effectors that we identified here as immobile.

354 Our screen revealed that three nucleocytoplasmic effectors can modify plasmodesmal  
355 function (ChEC8, ChEC127 and ChEC132), identifying that plasmodesmal regulation might  
356 occur during infection via indirect mechanisms. While effectors are expected to positively  
357 contribute to virulence, this is not always observable as an independent contribution; effectors  
358 may act in concert with other effectors or environmental conditions. In our study, we saw that  
359 only ChEC127 significantly and positively contribute to virulence independently as evidenced  
360 by increased susceptibility of Arabidopsis plants that express the effector (Fig. 4). Infection is  
361 a complex process and interacts with an array of host and environmental variables. Thus, it  
362 may not be surprising that excess of a single effector does not promote infection.

363 To identify host processes that are modulated in a non-cell autonomous way during  
364 infection, we performed an RNAseq analysis of plants constitutively expressing the  
365 hypermobile effectors ChEC123, ChEC127 and ChEC132 (Table S3-S5). Despite regulating  
366 pathogen virulence, ChEC127 induced differential expression of only 13 genes (Table S4),  
367 suggesting the mechanism by which it promotes virulence does not involve significant  
368 perturbation of gene expression. By contrast, ChEC123 and ChEC132, which did not  
369 independently promote virulence, did induce significant changes in gene expression (Table S3;  
370 Table S5). ChEC123 downregulated genes associated with glucosinolate production (glycosyl  
371 compound catabolism) and iron starvation and transport, indicating it may regulate defence and  
372 nutritional processes (Fig. 5b). The same effector up-regulated genes associated with leaf  
373 senescence which might contribute to the transition of *C. higginsianum* to the necrotrophic  
374 lifestyle (Fig. 5c). ChEC132 down regulated genes associated with iron metabolism (Fig. 5a)  
375 but most significantly perturbed processes associated with plant cell wall modification and  
376 growth. This raises the possibility that ChEC132 perturbs growth processes, possibly to limit  
377 resource consumption by the host. Overall, transcriptional analysis identifies that different host  
378 processes can be targeted by cell-to-cell mobile effectors. How manipulation of these processes  
379 in cells ahead of the infection front contributes to infection success requires further  
380 investigation.

381 Our screen for cell-to-cell mobility of *C. higginsianum* effectors has identified both  
382 mobile and hypermobile effectors. Further, we found evidence that some of these cytoplasmic  
383 effectors, both mobile and hypermobile, indirectly regulate plasmodesmata to increase their  
384 functional aperture. These observations identify that *C. higginsianum* has complex strategies  
385 for accessing the symplast which allows it to perturb processes associated with defence,  
386 nutrition and cell structure ahead of hyphal invasion. Evidence of hypermobility in the *C.*  
387 *higginsianum* effector repertoire identifies that exploiting plasmodesmata and cell to cell  
388 connectivity to extend pathogen reach is critical for infection.

389

### 390 **Acknowledgements**

391 Research in the Faulkner lab is supported by the European Research Council (725459,  
392 “INTERCELLAR”) and the Biotechnology and Biological Research Council  
393 (BBS/E/J/000PR9796). MO is supported by the Japan Society for the Promotion of Science,  
394 XL was supported by Marie-Curie Fellowship (749755, “HOPESEE”), JJ and NH are  
395 supported by the Norwich Research Park Doctoral Training Programme and MJ is supported  
396 by the John Innes Foundation.

397

### 398 **Authors Contributions**

399 MO, JJ, XL, KS, and JdK generated materials and performed experiments; MO, JJ, MJ, RJM  
400 and NH analysed data; CF managed the project; and MO, JJ and CF wrote the paper with  
401 support from all co-authors.

402

### 403 **Data Availability**

404 Raw or normalised cell counts from image analysis is available in Table S1. DESeq2 analysis  
405 of RNA sequencing experiments is available in Tables S3-S5.

406 **References**

- 407 **Adachi H, Contreras MP, Harant A, Wu CH, Derevnina L, Sakai T, Duggan C, Moratto**  
408 **E, Bozkurt TO, Maqbool A et al. 2019.** An N-terminal motif in NLR immune  
409 receptors is functionally conserved across distantly related plant species. *Elife* 8.
- 410 **Andrews S. 2010.** FastQC: a quality control tool for high throughput sequence data. Available  
411 online at: <http://www.bioinformatics.babraham.ac.uk/projects/fastqc>
- 412 **Aung K, Kim P, Li Z, Joe A, Kvitko B, Alfano JR, He SY. 2020.** Pathogenic Bacteria Target  
413 Plant Plasmodesmata to Colonize and Invade Surrounding Tissues. *Plant Cell*  
414 32(3):595-611.
- 415 **Boyle EI, Weng S, Gollub J, Jin H, Botstein D, Cherry JM, Sherlock G. 2004.**  
416 GO::TermFinder--open source software for accessing Gene Ontology information and  
417 finding significantly enriched Gene Ontology terms associated with a list of genes.  
418 *Bioinformatics* 20:3710-5.
- 419 **Caillaud MC, Wirthmueller L, Sklenar J, Findlay K, Piquerez SJ, Jones AM, Robatzek**  
420 **S, Jones JD, Faulkner C. 2014.** The plasmodesmal protein PDLP1 localises to  
421 haustoria-associated membranes during downy mildew infection and regulates callose  
422 deposition. *PLoS Pathogen* 10(10):e1004496-e1004496.
- 423 **Cao L, Blekemolen MC, Tintor N, Cornelissen BJC, Takken FLW. 2018.** The *Fusarium*  
424 *oxysporum* Avr2-Six5 Effector Pair Alters Plasmodesmatal Exclusion Selectivity to  
425 Facilitate Cell-to-Cell Movement of Avr2. *Molecular Plant* 11(5):691-705.
- 426 **Chen H, Ahmad M, Rim Y, Lucas WJ, Kim JY. 2013.** Evolutionary and molecular analysis  
427 of Dof transcription factors identified a conserved motif for intercellular protein  
428 trafficking. *New Phytol.* 198(4):1250-1260.
- 429 **Chen H, Jackson D, Kim JY. 2014.** Identification of evolutionarily conserved amino acid  
430 residues in homeodomain of KNOX proteins for intercellular trafficking. *Plant Signal*  
431 *Behav.* 9(3):e28355-e28355.

- 432 **Cheval C, Faulkner C. 2018.** Plasmodesmal regulation during plant-pathogen interactions.  
433 *New Phytol.* 217(1):62-67.
- 434 **Cheval C, Samwald S, Johnston MG, de Keijzer J, Breakspear A, Liu X, Bellandi A,**  
435 **Kadota Y, Zipfel C, Faulkner C. 2020.** Chitin perception in plasmodesmata  
436 characterizes submembrane immune-signaling specificity in plants. *Proc. Natl. Acad.*  
437 *Sci. U. S. A.* 117(17):9621-9629.
- 438 **Crawford K, Zambryski P. 2001.** Non-targeted and targeted protein movement through  
439 plasmodesmata in leaves in different developmental and physiological states. *Plant*  
440 *Physiol.* 125(4):1802-1812.
- 441 **Dallery JF, Lapalu N, Zampounis A, Pigné S, Luyten I, Amselem J, Wittenberg AHJ,**  
442 **Zhou S, de Queiroz MV, Robin GP et al. 2017.** Gapless genome assembly of  
443 *Colletotrichum higginsianum* reveals chromosome structure and association of  
444 transposable elements with secondary metabolite gene clusters. *BMC Genomics*  
445 18(1):667-667.
- 446 **Engler C., Kandzia R., Marillonnet S. 2008.** A one pot, one step, precision cloning method  
447 with high throughput capability. *PLoS One* 3(11):e3647.
- 448 **Ewels P., Magnusson M., Lundin S., Käller M. 2016.** MultiQC: summarize analysis results  
449 for multiple tools and samples in a single report. *Bioinformatics* 32(19): 3047–3048.
- 450 **Farmer E., Mousavi S., Lenglet A. 2013.** Leaf numbering for experiments on long distance  
451 signalling in Arabidopsis protocol exchange doi:10.1038/protex.2013.071
- 452 **Faulkner C, Petutschnig E, Benitez-Alfonso Y, Beck M, Robatzek S, Lipka V, Maule AJ.**  
453 **2013.** LYM2-dependent chitin perception limits molecular flux via plasmodesmata.  
454 *Proc. Natl. Acad. Sci. U. S. A.* 110(22):9166-9170.
- 455 **Gallagher KL, Benfey PN. 2009.** Both the conserved GRAS domain and nuclear localization  
456 are required for SHORT-ROOT movement. *Plant J.* 57(5):785-797.
- 457 **Gallagher KL, Paquette AJ, Nakajima K, Benfey PN. 2004.** Mechanisms regulating  
458 SHORT-ROOT intercellular movement. *Curr. Biol.* 14(20):1847-1851.



- 459 **Heinlein M, Epel BL. 2004.** Macromolecular transport and signaling through plasmodesmata.  
460 *Int. Rev. Cytol.* 235:93-164.
- 461 **Kankanala P, Czymmek K, Valent B. 2007.** Roles for rice membrane dynamics and  
462 plasmodesmata during biotrophic invasion by the blast fungus. *Plant Cell* 19(2):706-  
463 724.
- 464 **Johnston MG, Faulkner C. 2020.** A bootstrap approach is a superior statistical method for  
465 the comparison of cell-to-cell movement data. *New Phytol.* doi: 10.1111/nph.17159.
- 466 **Khang CH, Berruyer R, Giraldo MC, Kankanala P, Park SY, Czymmek K, Kang S,  
467 Valent B. 2010.** Translocation of *Magnaporthe oryzae* effectors into rice cells and their  
468 subsequent cell-to-cell movement. *Plant Cell* 22(4):1388-1403.
- 469 **Kim JY, Yuan Z, Cilia M, Khalfan-Jagani Z, Jackson D. 2002.** Intercellular trafficking of  
470 a *KNOTTED1* green fluorescent protein fusion in the leaf and shoot meristem of  
471 Arabidopsis. *Proc. Natl. Acad. Sci. U. S. A* 99(6):4103-4108.
- 472 **Kragler F, Monzer J, Shash K, Xoconostle-Cázares B, Lucas WJ. 1998.** Cell-to-cell  
473 transport of proteins: requirement for unfolding and characterization of binding to a  
474 putative plasmodesmal receptor. *Plant J.* 15(3):367-381.
- 475 **Le Fevre R, Evangelisti E, Rey T, Schornack S. 2015.** Modulation of Host Cell Biology by  
476 Plant Pathogenic Microbes. *Annu. Rev. of Cell and Dev. Biol.* 31(1):201-229.
- 477 **Lee JY, Wang X, Cui W, Sager R, Modla S, Czymmek K, Zybaliov B, van Wijk K, Zhang  
478 C, Lu H et al. 2011.** A plasmodesmata-localized protein mediates crosstalk between  
479 cell-to-cell communication and innate immunity in Arabidopsis. *Plant Cell* 23(9):3353-  
480 3373.
- 481 **Li H., Handsaker B., Wysoker A., Fennell T., Ruan J., Homer N., Marth G., Abecasis G.  
482 Durbin R., 1000 Genome Project Data Processing Subgroup. 2009.** The Sequence  
483 alignment/map (SAM) format and SAMtools. *Bioinformatics* 25: 2078-9.
- 484 **Li Z, Variz H, Chen Y, Liu S, Aung K. 2020.** Plasmodesmata-dependent intercellular  
485 movement of bacterial effectors. *bioRxiv* doi:10.1101/2020.12.10.420240

- 486 **Liu L, Chen X. 2018.** Intercellular and systemic trafficking of RNAs in plants. *Nat. Plants*  
487 4(11):869-878.
- 488 **Love MI., Huber W., Anders S. 2014.** Moderated estimation of fold change and dispersion  
489 for RNA-seq data with DESeq2. *Genome Biology* 15:550.
- 490 **Lucas W, Bouché-Pillon S, Jackson D, Nguyen L, Baker L, Ding B, Hake S. 1995.** Selective  
491 trafficking of KNOTTED1 homeodomain protein and its mRNA through  
492 plasmodesmata. *Science* 270(5244):1980-1983.
- 493 **Nakajima K, Sena G, Nawy T, Benfey PN. 2001.** Intercellular movement of the putative  
494 transcription factor SHR in root patterning. *Nature* 413(6853):307-311.
- 495 **O'Connell RJ, Thon MR, Hacquard S, Amyotte SG, Kleemann J, Torres MF, Damm U,  
496 Buiate EA, Epstein L, Alkan N et al. 2012.** Lifestyle transitions in plant pathogenic  
497 *Colletotrichum* fungi deciphered by genome and transcriptome analyses. *Nat. Genet.*  
498 44(9):1060-1065.
- 499 **Oparka KJ, Roberts AG, Boevink P, Cruz SS, Roberts I, Pradel KS, Imlau A, Kotlizky  
500 G, Sauer N, Epel B. 1999.** Simple, but Not Branched, Plasmodesmata Allow the  
501 Nonspecific Trafficking of Proteins in Developing Tobacco Leaves. *Cell* 97(6):743-  
502 754.
- 503 **Presti LL., Lanver D., Schweizer G., Tanaka S., Liang L., Tollot M., Zuccaro A.,  
504 Reissmann S., Kahmann R. 2015.** Fungal effectors and plant susceptibility. *Annu. Rev.*  
505 *Plant Biol.* 66:513-45.
- 506 **R Core Team. 2020.** R: a language and environment for statistical computing, v4.0.3. *R*  
507 *Foundation for Statistical Computing*, Vienna. <https://www.R-project.org>
- 508 **Schindelin J, Arganda-Carreras I, Frise E, Kaynig V, Longair M, Pietzsch T, Preibisch  
509 S, Rueden C, Saalfeld S, Schmid B., et al. 2012.** Fiji: an open-source platform for  
510 biological-image analysis. *Nat. Methods.* 9 (7):676-82.

- 511 **Schlicker A., Domingues FS., Rahnenführer J., Lengauer T. 2006.** A new measure for  
512 functional similarity of gene products based on Gene Ontology. *BMC Bioinformatics*  
513 7: 302.
- 514 **Stahl Y, Simon R. 2013.** Gated communities: apoplastic and symplastic signals converge at  
515 plasmodesmata to control cell fates. *J. Exp. Bot.* 64(17):5237-5241.
- 516 **Supek F, Bošnjak M, Škunca N, Šmuc T. 2011.** REVIGO summarizes and visualizes long  
517 lists of Gene Ontology terms. *PLoS ONE* 6(7): e21800.
- 518 **Taoka K, Ham BK, Xoconostle-Cázares B, Rojas MR, Lucas WJ. 2007.** Reciprocal  
519 phosphorylation and glycosylation recognition motifs control NCAPP1 interaction with  
520 pumpkin phloem proteins and their cell-to-cell movement. *Plant Cell* 19(6):1866-1884.
- 521 **Tomczynska I, Stumpe M, Doan TG, Mauch F. 2020.** A *Phytophthora* effector protein  
522 promotes symplastic cell-to-cell trafficking by physical interaction with  
523 plasmodesmata-localised callose synthases. *New Phytol.* 227(5):1467-1478.
- 524 **Toruño TY, Stergiopoulos I, Coaker G. 2016.** Plant-Pathogen Effectors: Cellular Probes  
525 Interfering with Plant Defenses in Spatial and Temporal Manners. *Annu. Rev. of*  
526 *Phytopathol.* 54(1):419-441.
- 527 **Wu X, Dinneny JR, Crawford KM, Rhee Y, Citovsky V, Zambryski PC, Weigel D. 2003.**  
528 Modes of intercellular transcription factor movement in the Arabidopsis apex.  
529 *Development* 130(16):3735-3745.
- 530 **Xu B, Cheval C, Laohavisit A, Hocking B, Chiasson D, Olsson TSG, Shirasu K, Faulkner**  
531 **C, Gilliham M. 2017.** A calmodulin-like protein regulates plasmodesmal closure  
532 during bacterial immune responses. *New Phytol.* 215(1):77-84.
- 533 **Xu X, Wang J, Xuan Z, Goldshmidt A, Borrill P, Hariharan N, Kim J, Jackson D. 2011.**  
534 Chaperonins facilitate KNOTTED1 cell-to-cell trafficking and stem cell function.  
535 *Science* 333(6046):1141-1144
- 536
- 537

## 538 **Figure Legends**

### 539 **Fig. 1 GFP fusions allow detection of cell-to-cell mobility screening of *C. higginsianum***

540 **effectors.** (a) Schematic of the dual expression module binary vectors used to screen for cell-  
541 to-cell mobility. The cartoon represents the patterns of localisation for each module's gene  
542 product expected for a mobile effector-GFP fusion. (b) Projections of confocal z-stacks (8-20  
543 individual focal planes, taken at 5.66  $\mu\text{m}$  intervals) of tissues expressing GFP alone and  
544 effector-GFP fusions. Mobility is visible when cells surrounding the transformed cell, marked  
545 by NLS-dTomato, show GFP fluorescence. ChEC133-GFP (middle row) shows an example of  
546 a cell-restricted, immobile effector while ChEC125-GFP (bottom row) shows an example of  
547 mobility to surrounding cells as observed for GFP alone (top panel). Arrows indicate NLS-  
548 dTomato fluorescence in the transformed cell, stars represent the transformed cells and  
549 arrowheads represent cells the GFP has moved into. Scale bar is 100  $\mu\text{m}$ .

### 550 **Fig. 2 Mobility quantification for nucleocytoplasmic effectors reveals mobile and**

551 **hypermobile effectors.** Mobility (number of cells to which GFP has moved around a  
552 transformed cell) of effector-GFP fusions. The standard curve is a quasi-Poisson generalised  
553 linear model with a log link function and the Bonferroni corrected confidence interval of the  
554 mean ( $p < 1 \times 10^{-5}$ ) (red ribbon). Effectors were determined to be significantly mobile (purple  
555 squares) by an exact Poisson test indicating the rate of movement is significantly different to  
556 the standard curve ( $p < 1 \times 10^{-5}$ ). Data are means  $\pm$  standard error ( $n > 30$ ,  $p < 1 \times 10^{-5}$ )

### 557 **Fig. 3 Plasmodesmal regulation by mobile and hypermobile effectors.** (a) Mobility of NLS-

558 dTomato plotted against the relative mobility ( $\text{Mob}_r$ ) of a co-expressed effector in *N.*  
559 *benthamiana* leaf epidermal cells. The standard curve represents NLS-dTomato mobility in the  
560 presence of GFP variants of different sizes with Bonferroni corrected confidence interval of  
561 the mean ( $p < 1 \times 10^{-5}$  red ribbon). NLS-dTomato movement was analysed by an exact Poisson  
562 test, identifying that ChEC8 and ChEC127 increase NLS-dTomato mobility (b) Mobility of  
563 mRFP (number of cells) in Arabidopsis leaf tissue assayed by microprojectile bombardment  
564 assays. Independent transgenic lines expressing ChEC127-GFP lines and ChEC132-GFP  
565 showed increased mobility of mRFP relative to Col-0. Boxes signifies the upper and lower  
566 quartiles, and the whiskers represent the minimum and maximum within  $1.5 \times$  interquartile  
567 range. The number of bombardment sites ( $n$ ) counted is  $\geq 92$ . Data was analysed by bootstrap  
568 analyses and asterisks indicate statistical significance compared with Col-0 plants (\*\* $p < 0.01$   
569 and \* $p < 0.05$ )

570 **Fig. 4 *C. higginsianum* lesion areas are larger in ChEC127 expressing Arabidopsis.**

571 Detached leaves from 4-5-week-old Arabidopsis were inoculated with *C. higginsianum* spores  
572 and lesion areas were measured 6 dpi (n > 60) and bootstrap analysis of the lesion area means  
573 identified that lesions are larger in ChEC127 expressing plants.

574 **Fig. 5 Hypermobility effectors can alter host plant gene expression patterns.** CirGO

575 visualisation of GO Terms enriched amongst (a) genes down-regulated by ChEC132, (b) genes  
576 down-regulated by ChEC123, and (c) genes upregulated by ChEC123. Slice size represents the  
577 proportion of DEGs attributed to this GO Term. The inner ring slices represent 'parent' GO  
578 terms and the labelled outer ring slices represent 'child' GO terms.

579

580

## 581 **Supplementary Figure Legends**

582 **Fig. S1 Mobility of GFP variants of known sizes to generate a standard curve.** Binary  
583 vectors with different sized GFP fusions and NLS-Tomato were transiently expressed in 5-  
584 week-old *N. benthamiana* and imaged by confocal microscopy 3 dpi: GFP (26 kDa), YFPc-  
585 GFP (37.2 kDa), YFPn-GFP (45 kDa) and 2xGFP (52 kDa). (a) Arrows indicate NLS-dTomato  
586 fluorescence in the nuclei of transformed cells and arrowheads indicate examples of GFP  
587 movements and stars indicate the transformed cell. Each image is a maximum projection of a  
588 z-stack comprising 8-20 individual focal planes acquired at 4.61/5.66  $\mu\text{m}$  intervals. Scale bars  
589 represent 100  $\mu\text{m}$ . (b) Observed mobility for the various GFP-fusions plotted against their  
590 molecular weight. This data was used to define a standard curve with a quasi-Poisson  
591 generalised linear model with a log link function. The standard error (purple ribbon) and the  
592 Bonferroni corrected confidence interval of the mean ( $p < 1 \times 10^{-5}$ , red ribbon) was calculated.  
593 The point density shows the number of replicates at that value.

594 **Fig. S2 Effector-GFP movement was dependent on effector size.** Raw data of mobility assay  
595 showing data spread (summarised in Figure 2) for all effector-GFP fusions. The dot gray level  
596 indicates the number of replicates at that value.

597 **Fig. S3 Stability of hypermobile effector-GFPs in *N. benthamiana* leaves** Five-week-old  
598 *N. benthamiana* leaves expressing free GFP and effector-GFP fusions were harvested 3dpi.  
599 Total proteins were extracted from harvested leaves, separated by SDS-PAGE and were  
600 detected using anti GFP antibody. Protein loading was monitored by Coomassie Brilliant Blue  
601 (CBB) staining of bands corresponding to the ribulose-1,5-bisphosphate carboxylase large  
602 subunit (RBCL).

603 **Fig. S4 Mobility of NLS-dTomato in effector expressing tissues** (a) Mobility of NLS-  
604 dTomato was detected when image display settings were adjusted post-collection. The image  
605 on the left shows the imaging data under unsaturated black/white display levels and on the right  
606 when the brightness and contrast were enhanced. The image represents a maximum projection  
607 of a z-stack comprising 11 individual focal planes. Scale bars represent 50  $\mu\text{m}$ . (b) NLS-  
608 dTomato was detected in surrounding cells (arrows) when co-expressed with a variety of  
609 effector-GFP fusions. Stars identify the transformed cell. Images are maximum projections of  
610 z-stacks comprising 8-20 individual focal planes acquired at an interval of 5.66  $\mu\text{m}$ . Scale bars  
611 represent 100  $\mu\text{m}$ .

612 **Fig. S5 NLS-Tomato moves an average of 2.5 cells irrespective of GFP fusion size.** Binary  
613 vectors encoding different sized GFP fusions (from 26kDa to 52kDa) and NLS-Tomato were  
614 transiently expressed in *N. benthamiana* leaves and imaged by confocal microscopy 3 dpi. The  
615 number of cells the NLS-dTomato had moved was counted and a line of best fit generated. The  
616 standard error (purple ribbon) and the Bonferroni corrected confidence interval of the mean ( $p$   
617  $< 1 \times 10^{-5}$ ) (red ribbon) was calculated for the data. The dot gray level indicates the number of  
618 replicates at that value.

619 **Fig. S6 Expression and localisation of the hypermobile effector in Arabidopsis stable lines**  
620 Confocal micrographs of the epidermis of mature leaves of two independent transgenic  
621 Arabidopsis lines that express ChEC123, ChEC127 and ChEC132 fused to a fluorescent  
622 protein. Each image is a maximum projection of a z-stack comprising 8-20 individual focal  
623 planes acquired at a plane interval of 3  $\mu\text{m}$ . Scale bars are 100  $\mu\text{m}$ .

#### 624 **Supplemental Table legends**

625 **Table S1** Plasmids used and constructed in this study

626 **Table S2** Nucleocytoplasmic effectors screened for cell-to-cell mobility

627 **Table S3** DESeq2 analysis of ChEC123-expressing *A. thaliana* compared to Col-0

628 **Table S4** DESeq2 analysis of ChEC127-expressing *A. thaliana* compared to Col-0

629 **Table S5** DESeq2 analysis of ChEC132-expressing *A. thaliana* compared to Col-0

630 **Table S6** Raw data from mobility assays presented in Fig 2, Fig 3 and Fig S2.

**Figure 1**

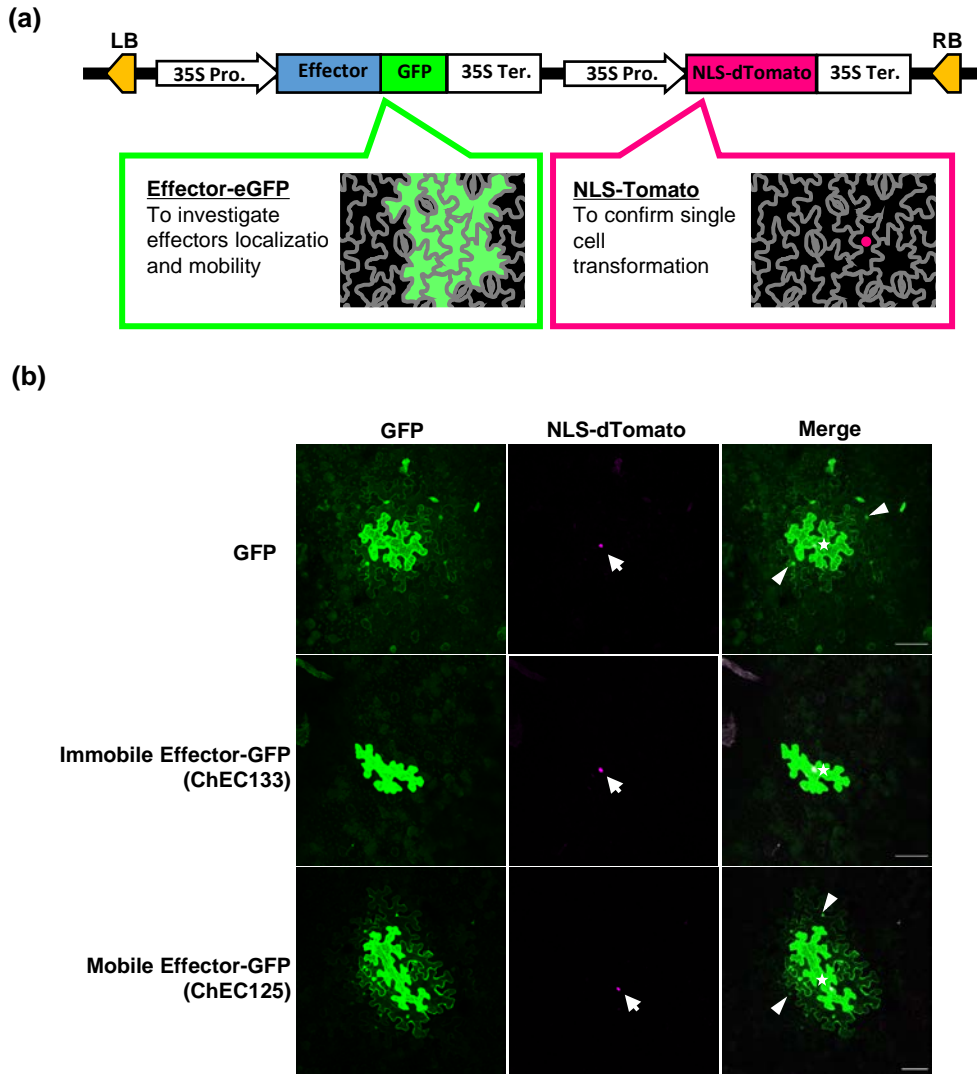

**Fig. 1 GFP fusions allow detection of cell-to-cell mobility screening of *C. higginsianum* effectors.** (a) Schematic of the dual expression module binary vectors used to screen for cell-to-cell mobility. The cartoon represents the patterns of localisation for each module's gene product expected for a mobile effector-GFP fusion. (b) Projections of confocal z-stacks (8-20 individual focal planes, taken at 5.66  $\mu\text{m}$  intervals) of tissues expressing GFP alone and effector-GFP fusions. Mobility is visible when cells surrounding the transformed cell, marked by NLS-dTomato, show GFP fluorescence. ChEC133-GFP (middle row) shows an example of a cell-restricted, immobile effector while ChEC125-GFP (bottom row) shows an example of mobility to surrounding cells as observed for GFP alone (top panel). Arrows indicate NLS-dTomato fluorescence in the transformed cell, stars represent the transformed cells and arrowheads represent cells the GFP has moved into. Scale bar is 100  $\mu\text{m}$ .



**Figure 2**

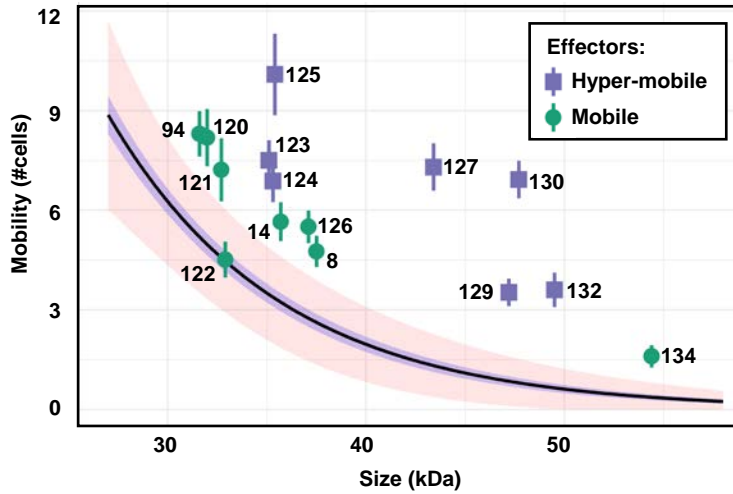

**Fig. 2 Mobility quantification for nucleocytoplasmic effectors reveals mobile and hypermobile effectors.** Mobility (number of cells to which GFP has moved around a transformed cell) of effector-GFP fusions. The standard curve is a quasi-Poisson generalised linear model with a log link function and the Bonferroni corrected confidence interval of the mean ( $p < 1 \times 10^{-5}$ ) (red ribbon). Effectors were determined to be significantly mobile (purple squares) by an exact Poisson test indicating the rate of movement is significantly different to the standard curve ( $p < 1 \times 10^{-5}$ ). Data are means  $\pm$  standard error ( $n > 30$ ,  $p < 1 \times 10^{-5}$ )

**Figure 3**

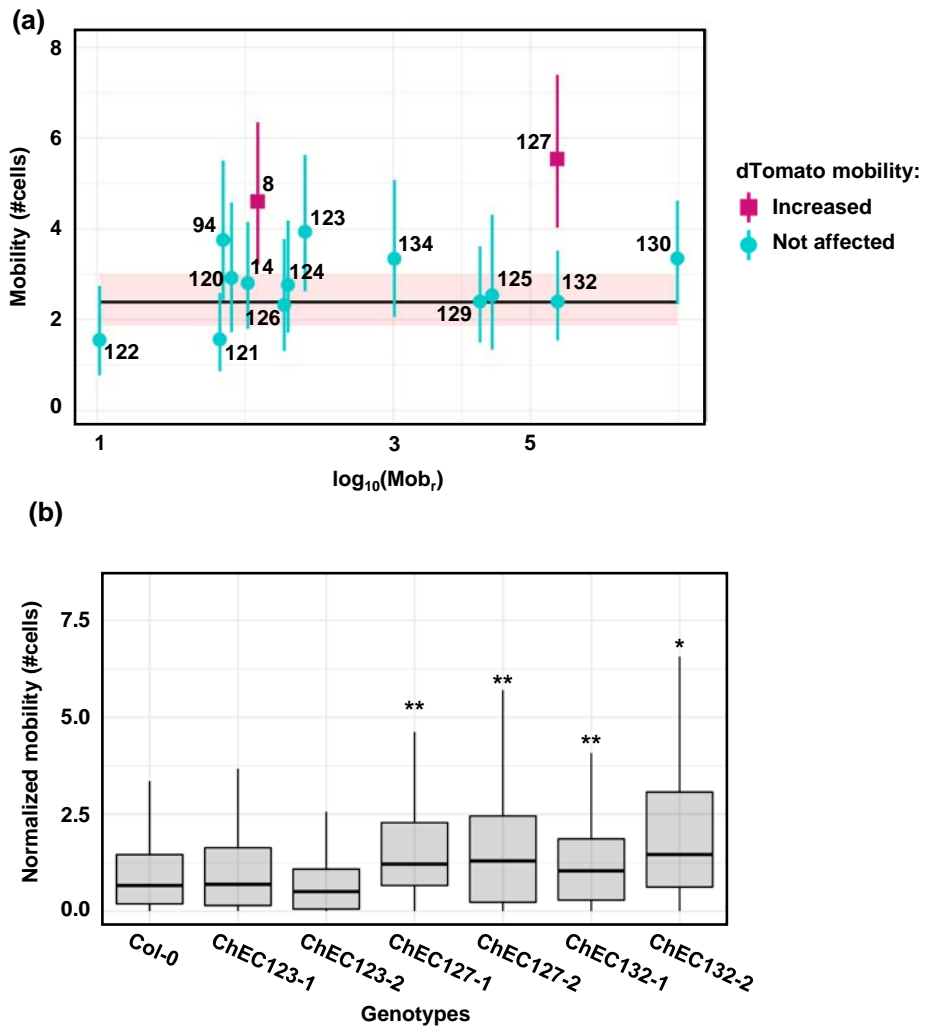

**Fig. 3 Plasmodesmal regulation by mobile and hypermobile effectors.** (a) Mobility of NLS-dTomato plotted against the relative mobility ( $\text{Mob}_r$ ) of a co-expressed effector in *N. benthamiana* leaf epidermal cells. The standard curve represents NLS-dTomato mobility in the presence of GFP variants of different sizes with Bonferroni corrected confidence interval of the mean ( $p < 1 \times 10^{-5}$  red ribbon). NLS-dTomato movement was analysed by an exact Poisson test, identifying that ChEC8 and ChEC127 increase NLS-dTomato mobility (b) Mobility of mRFP (number of cells) in Arabidopsis leaf tissue assayed by microprojectile bombardment assays. Independent transgenic lines expressing ChEC127-GFP lines and ChEC132-GFP showed increased mobility of mRFP relative to Col-0. Boxes signifies the upper and lower quartiles, and the whiskers represent the minimum and maximum within  $1.5 \times$  interquartile range. The number of bombardment sites ( $n$ ) counted is  $\geq 92$ . Data was analysed by bootstrap analyses and asterisks indicate statistical significance compared with Col-0 plants (\*\* $p < 0.01$  and \* $p < 0.05$ )

**Figure 4**

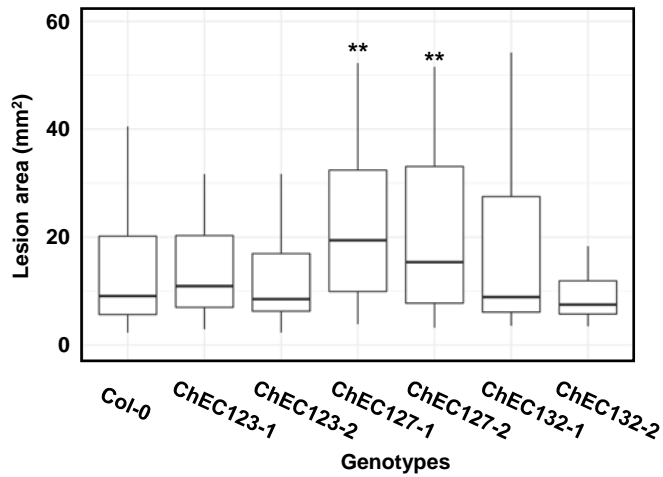

**Fig. 4** *C. higginsianum* lesion areas are larger in ChEC127 expressing Arabidopsis. Detached leaves from 4-5-week-old Arabidopsis were inoculated with *C. higginsianum* spores and lesion areas were measured 6 dpi (n > 60) and bootstrap analysis of the lesion area means identified that lesions are larger in ChEC127 expressing plants.

**Figure 5**

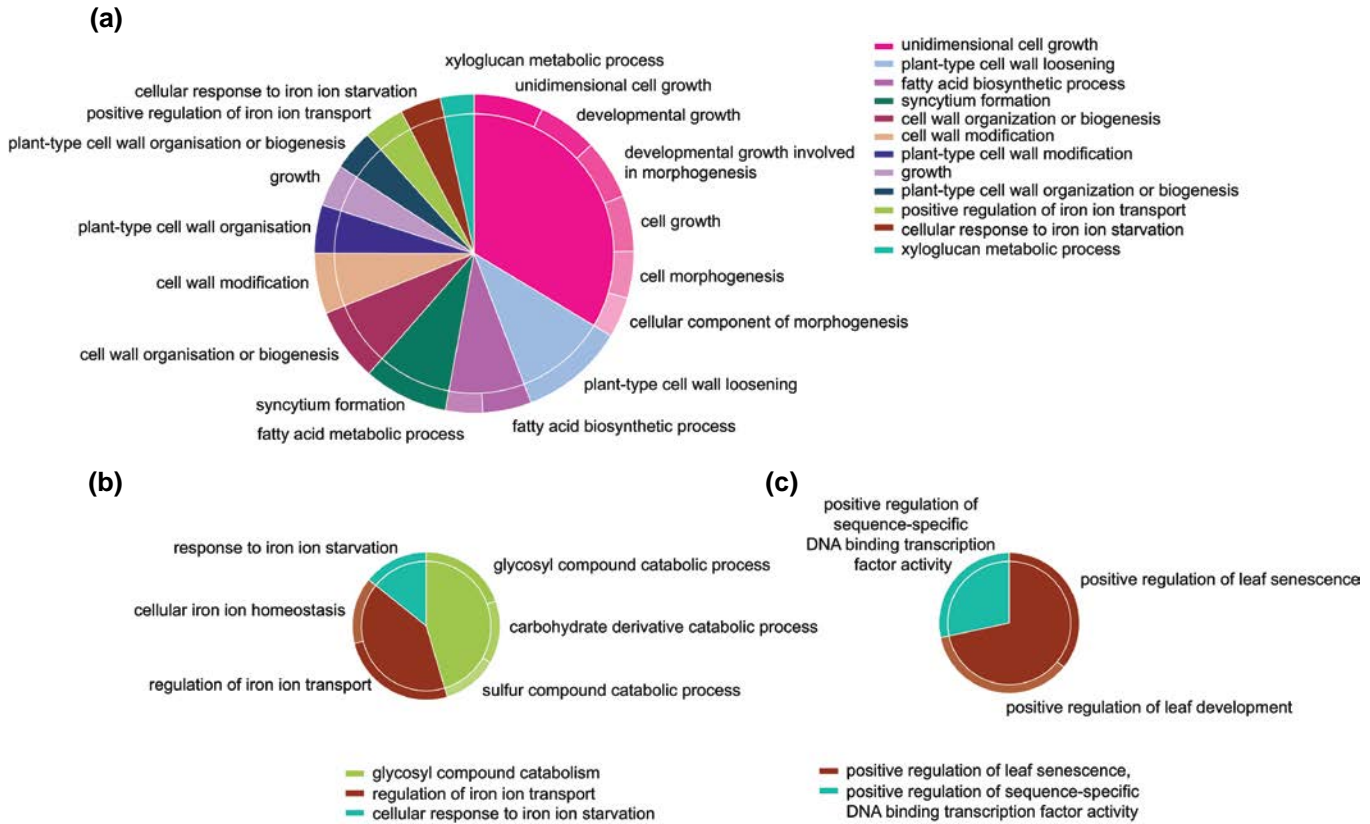

**Fig. 5 Hypermobile effectors can alter host plant gene expression patterns.** CirGO visualisation of GO Terms enriched amongst (a) genes down-regulated by ChEC132, (b) genes down-regulated by ChEC123, and (c) genes up-regulated by ChEC123. Slice size represents the proportion of DEGs attributed to this GO Term. The inner ring slices represent 'parent' GO terms and the labelled outer ring slices represent 'child' GO terms.
